# Supplementary material
Source: publisher site journal article supplement (https://www.dovepress.com/article/298303)
Supplement: Supplementary file 1 [file get_supplementary_file.php]

**Supplementary Materials**

Both tasks activate the Piriform Cortex and thus when the two tasks are compared to each other this area of activation appears to be either absent (OI > OM) or only weakly observed (OM > OI). Below we present a One-way ANOVA using repeated measures to combine the data from both tasks to demonstrate that this part of the olfactory sensory cortex is activated by these tasks. A cluster-determining threshold of p<0.001 uncorrected and a cluster extent of 10 voxels was used.

Table S1. Odor Memory and Odor Identification Tasks Combined

| **Brain Region** | **Peak T Statistic** | **Cluster Size** | **MNI Coordinates** |
| --- | --- | --- | --- |
| R Insula | 7.59 | 417 | 36, 22, 0 |
| L Insula | 6.30 | 250 | -34, 18, 0 |
| L Hippocampus | 4.71 | 83 | -16, -30, -4 |
| R Hippocampus | 4.48 | 77 | 22, -26, -6 |
| R Para-Hippocampus | 4.04 | 12 | 16, -36, -4 |
| R Piriform | 4.32 | 52 | 22, -4, -12 |
| L Piriform | 4.01 | 14 | -30, 4, -16 |
